# Supplementary figures and images for: Super-resolution imaging uncovers the nanoscopic segregation of polarity proteins in epithelia
Source: eLife journal article supplement (doi:10.7554/elife.62087), 2022-11-04

$\alpha$ Tub

WT KI

Tub

WT KI

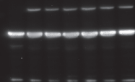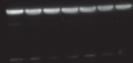

Supplement: app1-fig1-data1 [file elife-62087-app1-fig1-data1-v2.zip]

$\alpha$ Tub

Caco-2

siCT siCRB3

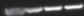

Supplement: app1-fig1-data1 [file elife-62087-app1-fig1-data1-v2.zip]

$\alpha$ PAR6 $\beta$

$\alpha$ GFP

WT KI

WT KI

PAR6 $\beta$ -Cit

PAR6 $\beta$ -Citrine

PAR6 $\beta$

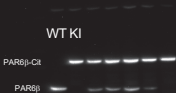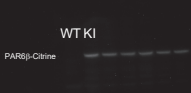

Supplement: app1-fig1-data1 [file elife-62087-app1-fig1-data1-v2.zip]

$\alpha$ CRB3

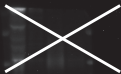

siCT siCRB3

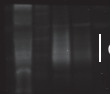

CRB3

Supplement: app1-fig1-data1 [file elife-62087-app1-fig1-data1-v2.zip]
